# Supplementary material for: Expression and function of the empty spiracles gene in olfactory sense organ development of Drosophila melanogaster
Source: Oxford University Press journal article supplement (doi:10.1242/dev.052407), 2010-10-12
Supplement: dev052407-tables1.pdf [file dev052407-tables1.pdf]

**Table S1. Frequencies of clones obtained among the trichoid and basiconic sensilla**

| OR                            | Sensillum type | Glomerulus  | Wild-type clonal frequency (%) | <i>ems</i> clonal frequency (%) | Phenotype frequencies                                                 |
|-------------------------------|----------------|-------------|--------------------------------|---------------------------------|-----------------------------------------------------------------------|
| <b>Trichoid-specific ORs</b>  |                |             |                                |                                 |                                                                       |
| 23a                           | at2            | DA3         | 70                             | 65                              | 5/17 targeting defects (including ectopic glomerulus targeting)       |
| 47b                           | at4            | VA1v        | 100                            | 100                             | 8/15 targeting defects                                                |
| 67d                           | at1            | DA1 and VA6 | 62.5                           | 65                              | 3/13 targeting defects                                                |
| 88a                           | at4            | VA1d        | 100                            | 100                             | 3/17 targeting defects                                                |
| 43a                           | at3            | DA4l        | 61                             | 40                              | 0/11 targeting defects                                                |
| 83c                           | at2            | DC3         | 100                            | 87.5                            | 0/14 targeting defects                                                |
| 65a                           | at4            | DL3         | 82                             | 81.8                            | 0/16 targeting defects                                                |
| <b>Basiconic-specific ORs</b> |                |             |                                |                                 |                                                                       |
| 10a                           | ab1            | DL1         | 52                             | 47                              | 4/10 targeting defects (including one non-olfactory neuropile target) |
| 59b                           | ab2            | DM4         | 83.3                           | 42.9                            | 0/15 targeting defects                                                |
| 85f                           | ab10           | DL4         | 100                            | 59                              | 0/13 targeting defects                                                |
